# Supplementary material
Source: Springer Nature journal article supplement (https://www.springermedizin.de/resource/supplementary/12936_2008_620_MOESM3_ESM.pdf/9547840)
Supplement: MOESM3 [file 9547840]

**Predictors of household ownership of any net**

| COMBINED Model A*                |           |           |         | URBAN Model B§                   |                |           |         |                |             | RURAL Model C† |                          |                 |           |         |                 |           |         |
|----------------------------------|-----------|-----------|---------|----------------------------------|----------------|-----------|---------|----------------|-------------|----------------|--------------------------|-----------------|-----------|---------|-----------------|-----------|---------|
| §Predictors                      | (n=4186)# |           |         | §Predictors                      | South (n=589)# |           |         | North (n=891)# |             |                | §Predictors              | South (n=1587)# |           |         | North (n=1119)# |           |         |
|                                  | **OR      | 95% CI**  | P-value |                                  | ^OR            | 95% CI    | P-value | ^OR            | 95% CI      | P-value        |                          | †OR             | 95% CI    | P-value | †OR             | 95% CI    | P-value |
| U5 child in the HH <sup>++</sup> |           |           |         | Education                        |                |           |         |                |             |                | U5 child in the HH       |                 |           |         |                 |           |         |
| No                               | 1.00      |           |         | No                               |                |           |         | 1.00           |             |                | No                       | 1.00            |           |         | -               |           |         |
| Yes                              | 1.60      | 1.40-1.90 | <0.0001 | Yes                              | -              | -         |         | 1.42           | 1.02-1.98   | <0.0001        | yes                      | 1.74            | 1.36-2.23 | <0.0001 | -               | -         | -       |
| Family size <sup>∞</sup>         | 2.23      | 1.57-3.18 | <0.0001 | Urban WI                         | -              | -         | -       | 1.28           | 1.09-1.50   | 0.003          | Family size <sup>∞</sup> | 3.59            | 1.91-6.76 | <0.0001 | 2.71            | 1.43-5.11 | 0.002   |
| Residence                        |           |           |         | Health facility                  |                |           |         |                |             |                | Health facility          |                 |           |         |                 |           |         |
| Urban                            | 1.00      |           |         | Absent                           | 1.00           |           |         | 1.00           |             |                | Absent                   | 1.00            |           |         | -               |           |         |
| Rural                            | 1.26      | 1.05-1.52 | 0.021   | Present                          | 2.88           | 1.54-5.37 | 0.001   | 0.59           | 0.41 - 0.81 | 0.038          | Present                  | 1.58            | 1.20-2.08 | 0.001   | -               | -         | -       |
| Education                        |           |           |         | U5 child in the HH <sup>++</sup> |                |           |         |                |             |                | HH Religion              |                 |           |         |                 |           |         |
| No                               | 1.00      |           |         | No                               | 1.00           |           |         | -              |             |                | Islam                    | 1.00            |           |         | 1.00            |           |         |
| Yes                              | 1.29      | 1.08-1.53 | 0.005   | Yes                              | 3.24           | 1.99-5.27 | <0.0001 | -              | -           | -              | Christianity             | 2.35            | 1.32-4.20 | 0.004   | 0.41            | 0.30-0.55 | <0.0001 |
| Region*Residence                 |           |           |         |                                  |                |           |         |                |             |                | Other                    | 1.24            | 0.25-6.18 | 0.878   | 0.23            | 0.03-1.91 | 0.175   |
| South*Urban                      | 1.00      |           |         |                                  |                |           |         |                |             |                | Rural WI                 | 1.33            | 1.19-1.48 |         |                 |           |         |
| North*Rural                      | 1.51      | 1.25-1.82 | <0.0001 |                                  |                |           |         |                |             |                | Education                |                 |           |         |                 |           |         |
| Combined WI                      | 1.24      | 1.15-1.34 | <0.0001 |                                  |                |           |         |                |             |                | No                       | 1.00            |           |         | -               |           |         |
|                                  |           |           |         |                                  |                |           |         |                |             |                | Yes                      | 1.55            | 1.16-2.09 | 0.003   | -               | -         | -       |

§ Variables in the final models.

#Data included in the analysis, all missing data were excluded.

P-values significant at 0.05 CI, confidence interval

<sup>∞</sup> log value was used in analysis

H&L, Hosmer and Lemeshow goodness-of-fit test.

<sup>++</sup>HH, households; WI, wealth index;

\* Logistic regression run for combined data (H&L test P-value =0.82)

\*\*OR, Odds ratio; adjusted for religion, region by residence, religion by region, and combined household wealth index by household head's gender.

§ Model developed for urban household, data split by region (H&L test P-value: South, 0.96; North, 0.32)

^OR, odds ratio adjusted for religion, family size, religion by region, education by urban wealth index and urban wealth index.

† Model developed for rural households, data split by region (H&L test P-value: South, 0.07; North, 0.34)

†OR, odds ratio adjusted for household head's gender, rural wealth index, and rural wealth index by household head's gender.
